# Supplementary material for: Robust genome and RNA editing via CRISPR nucleases in PiggyBac systems
Source: PubMed Central journal article supplement (PMC8964983; doi:10.1016/j.bioactmat.2022.01.046), 2022-02-07
Supplement: mmc1.pdf [file mmc1.pdf]

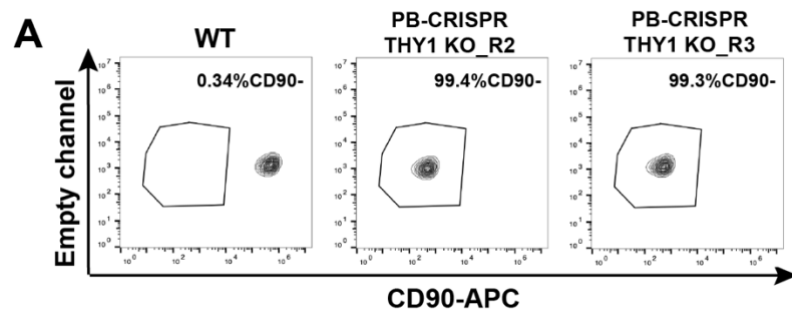

**Figure S1. A.** (Related to Fig. 2C) Two more biological replicates (repeat 2 and repeat 3) of flow cytometry data of *THY1* knockout with PB-CRISPR.

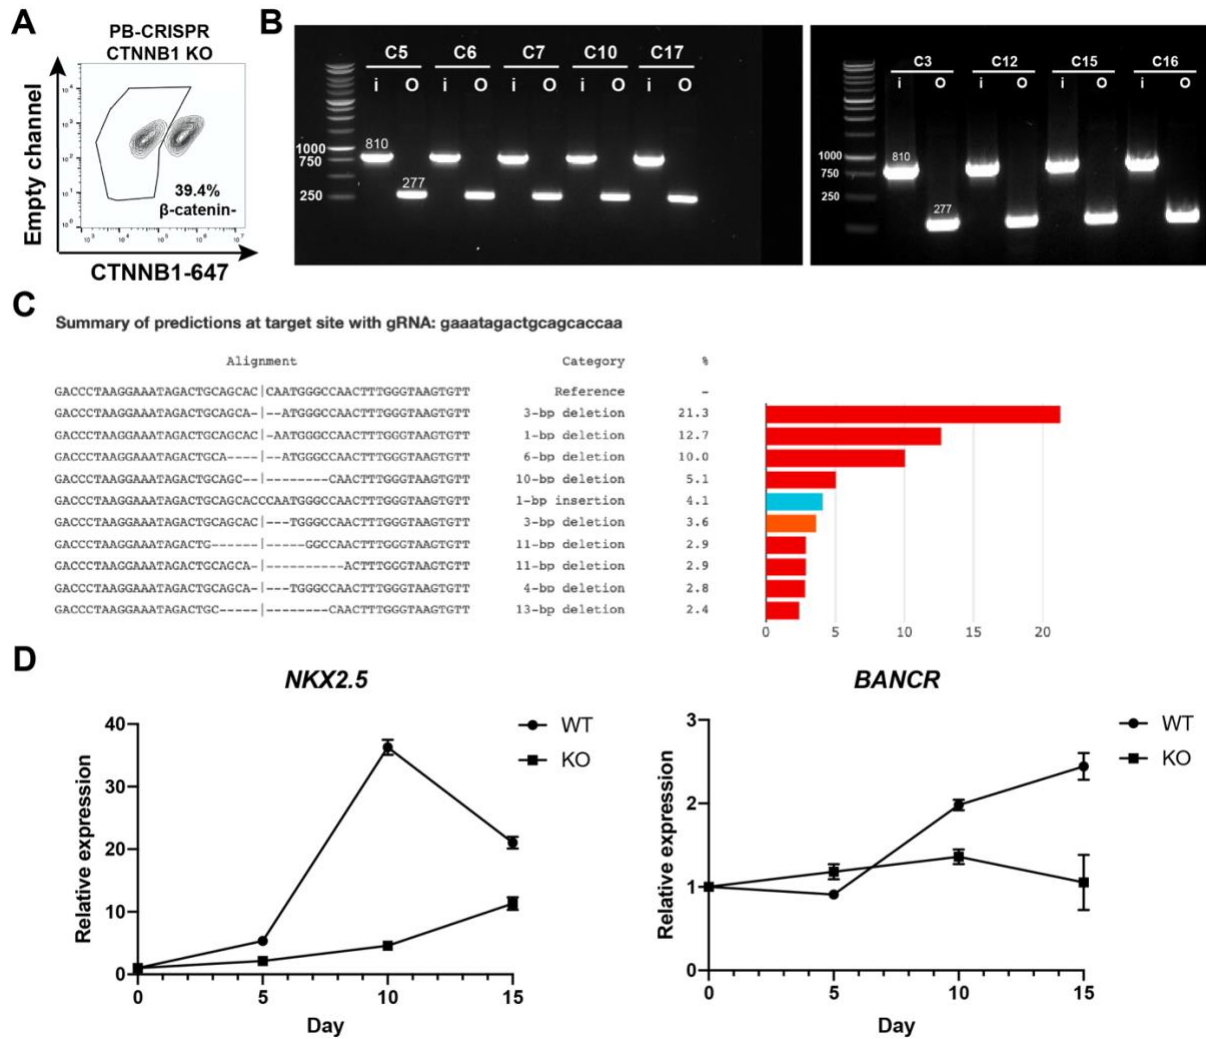

**Figure S2.** A. Flow cytometry against  $\beta$ -catenin with IMR90C4 PB-CRISPR CTNNB1KO cells after two weeks of Puromycin selection. B. Gel images of PCR products for IL32 knockout genotyping with more single cell derived colonies. C. Indelphi (<https://indelphi.giffordlab.mit.edu>) predicted that 3bp deletion is the most likely mutation with indicated gRNA design. D. Dynamic RNA expression of *NKX2.5* and *BANCR* on day 0, 5, 10, and 15 of CM differentiation with WT or PB-CRISPR *BANCR*KO *OCT4-GFP* H1 cells.  $\Delta\Delta$ Ct was performed.

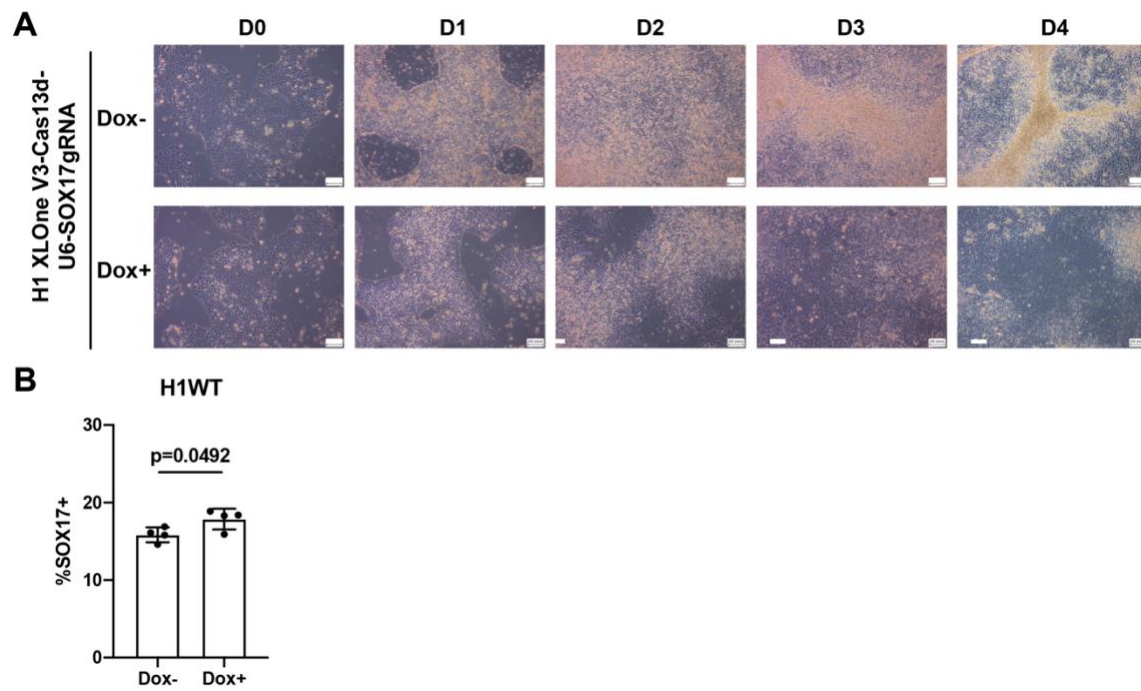

**Figure S3.** A. Daily images with XLOne-Puro-Cas13d-eGFP-U6-SOX17gRNA H1 cells during DE differentiation with or without Dox treatment. Scale bar: 130  $\mu$ m. B. H1 WT cells were induced for DE differentiation with or without the presence of 5ug/mL dox. Cells were harvested for flow cytometry stained against SOX17 on day 4.

**Table S1. gRNA and Primers**

|                               |                         |
|-------------------------------|-------------------------|
| THY1KO gRNA                   | CATGGCGGCAGTCCAGACGA    |
| CTNNB1KO gRNA                 | GAAACAGCTCGTTGTACCGC    |
| IL32KO gRNA1                  | GGCCGCCATGTGCTTCCCGA    |
| IL32KO gRNA2                  | GTCCTACGGAGCCCCACGGG    |
| IL32KO inside primer_forward  | AGAAGCTGAAGGCCCGAAT     |
| IL32KO inside primer_reverse  | TCCAGGTAGCCCTCTTTGAA    |
| IL32KO outside primer_forward | ATTTGTGCCAGGAAGACTGC    |
| IL32KO outside primer_reverse | GGCAAAGGTGGTGTTCAGTA    |
| BANCRKO gRNA                  | GAAATAGACTGCAGCACCAA    |
| BANCRKO TA primers_1_forward  | TGTAGGGTCTGGATTGGGAC    |
| BANCRKO TA primers_1_reverse  | TTGCGTCTCAAACCCAAGTC    |
| BANCRKO TA primers_2_forward  | TGTGTGAGATCCAAGAACCTTC  |
| BANCRKO TA primers_2_reverse  | ACCTTCCTAAGTTGCGTCTCA   |
| BANCR_qPCR_forward            | GATTGGGACCCTTTTCTGGT    |
| BANCR_qPCR_reverse            | TTCCTTAGGGTCAGGGGTCT    |
| NKX2.5_qPCR_forward           | AGAGCCGAAAAGAAAGCCTG    |
| NKX2.5_qPCR_reverse           | CCGCACAGTAATGGTAAGGG    |
| THY1KD gRNA1                  | AAAAAGTACAAAAAGACAGCCAG |
| THY1KD gRNA2                  | CAAGACTGTTAGCAGGAGAGCGA |
| THY1KD gRNA3                  | TAAACCAGACAGAAGCAGCTCTG |
| THY1_qPCR_forward             | GAAGGTCCTCTACTTATCCGCC  |
| THY1_qPCR_reverse             | TGATGCCCTCACACTTGACCAG  |
| SOX17KD gRNA                  | ACCATAAATTATATGCCAACACA |
| SOX17_qPCR_forward            | GGCGCAGCAGAATCCAGA      |
| SOX17_qPCR_reverse            | CCACGACTTGCCCAGCAT      |

**Table S2. Antibodies**

| Name                                          | Catalog number                                  | Dilution |
|-----------------------------------------------|-------------------------------------------------|----------|
| CAS9                                          | Biologend, #844301, mouse IgG1                  | 1:100    |
| $\beta$ -Catenin                              | BD, #610153, mouse IgG                          | 1:200    |
| CD90-APC                                      | Biologend, #328113, mouse IgG1                  | 1:60     |
| SOX17-APC                                     | R&D systems, #IC1924A, goat IgG                 | 1:50     |
| Goat anti-mouse IgG<br>(H+L), Alexa Fluor 647 | Thermo Fisher Scientific Invitrogen<br>#A-21235 | 1:1000   |

**Table S3. Plasmids**

| <b>Name</b>                          | <b>Catalog number</b> |
|--------------------------------------|-----------------------|
| PB-CRISPR                            | Addgene, #160047      |
| XLOne-Puro Cas13d-eGFP U6-BbsI       | Addgene, #155184      |
| XLOne-Puro Cas13d-eGFP U6-SOX17gRNA1 | Addgene, #155187      |
